# Supplementary material
Source: PubMed Central journal article supplement (PMC7316388)
Supplement: NIHMS1591085-supplement-Supplemental_figure_1.pdf [file NIHMS1591085-supplement-Supplemental_figure_1.pdf]

# Supplementary Figure 1.

Supplementary Fig. 1. Insertion of new multiple cloning site into pEGFP-C3 vector. See Materials and Methods for explanation.

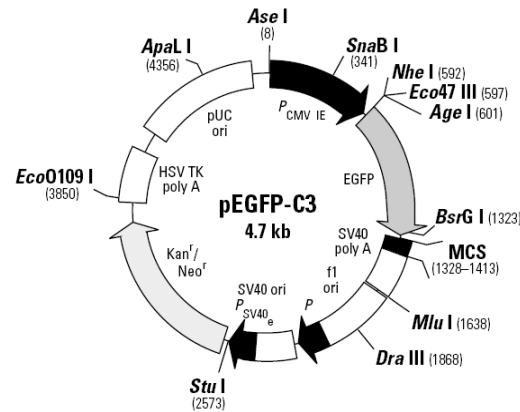

## Original MCS

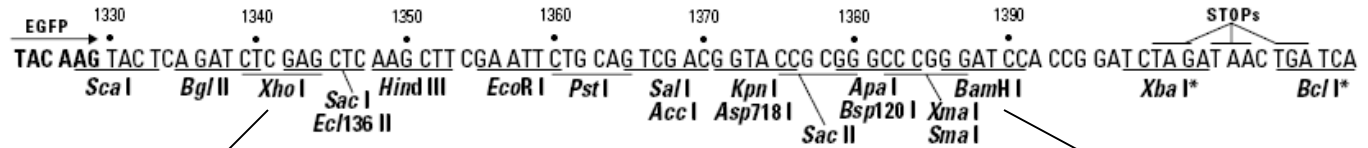

## New MCS

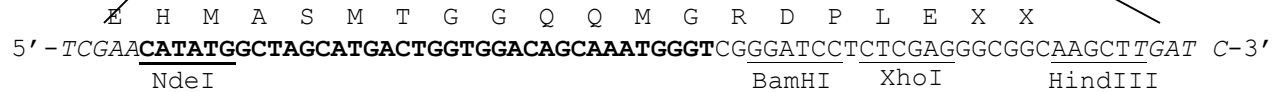

- Underline – new restriction enzyme sites in the new MCS
- **Boldface** - Φ10 recognition sequence
- *Italics* – XhoI and BamHI sites that were destroyed upon ligation of the new MCS into pEGFP
- Oligos for New MSC: 1855MCSXho1for  
1856MCSBamH1rev
