# Supplementary material
Source: PubMed Central journal article supplement (PMC7316388)
Supplement: NIHMS1591085-supplement-Supplemental_figure_2.pdf [file NIHMS1591085-supplement-Supplemental_figure_2.pdf]

## Supplementary Figure 2.

### 1) Remove stop codon at C-terminus of mCherry sequence

Supplementary Fig. 2. Removal of C-terminal stop codon in mCherry sequence in mCherry-pRSETB vector. See Materials and Methods for explanation.

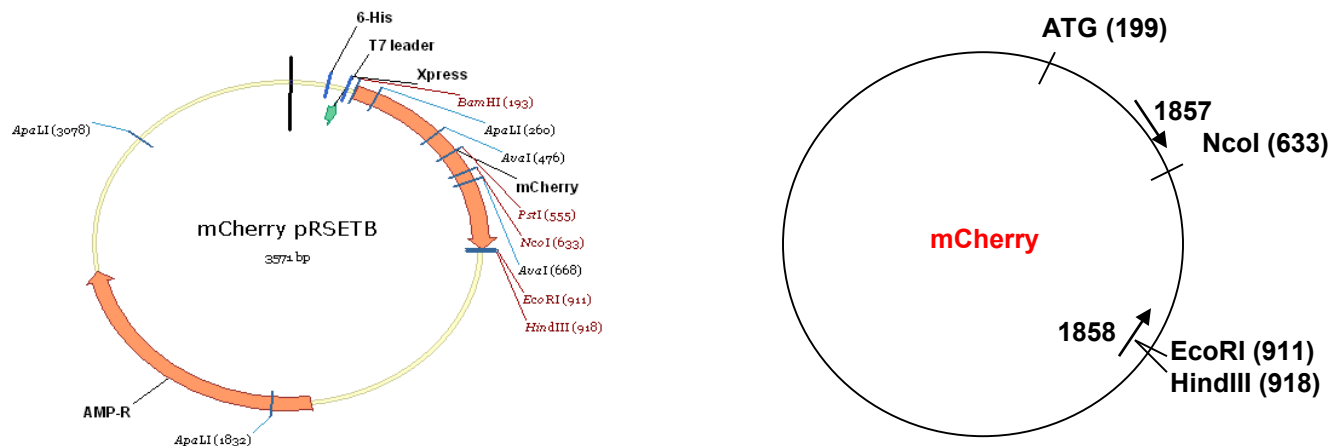

Forward primer #1857 (bp 610-632)

Reverse primer #1858 (bp 924-891) – removes stop codon (TAA → TAC) and inserts extra bp's to separate EcoRI and HindIII restriction sites

|                         |     |                           |                               |     |
|-------------------------|-----|---------------------------|-------------------------------|-----|
|                         |     | <b>EcoRI</b>              | <b>HindIII</b>                |     |
| <b>Original mCherry</b> | 891 | 5' -GGACGAGCTGTACAAG      | <b>TAA</b> GAATTTCGAAGCTTG-3' | 924 |
| <b>sequence:</b>        | 891 | 3' -CCTGCTCGACATGTTTCATTC | TTAAGCTTCGAAC-5'              | 924 |

|                           |  |                                                 |                                    |  |
|---------------------------|--|-------------------------------------------------|------------------------------------|--|
|                           |  | ↓ <b>EcoRI</b>                                  | <b>HindIII</b>                     |  |
| <b>Stop codon removed</b> |  | 5' -GGACGAGCTGTACAAG                            | <b>TAC</b> GAATTCTCCCTGGAAGCTTG-3' |  |
| <b>and bp's inserted:</b> |  | 3' -CCTGCTCGACATGTTTCATGCTTAAGAGGGACCTTCGAAC-5' | ← <b>#1858</b>                     |  |

#### Instructions:

- PCR out the mCherry fragment using primers #1857 and #1858
- Gel purify the PCR fragment
- Digest both the PCR fragment and the mCherry-pRSETB with NcoI and HindIII
- Ligate the PCR fragment into the digested mCherry-pRSETB
- Sequence to determine that the stop codon has been removed
