# Supplementary material
Source: PubMed Central journal article supplement (PMC7316388)
Supplement: NIHMS1591085-supplement-Supplemental_figure_3.pdf [file NIHMS1591085-supplement-Supplemental_figure_3.pdf]

## Supplementary Figure 3.

### 2) Substitute mCherry for GFP in the pEGFP-C3 background.

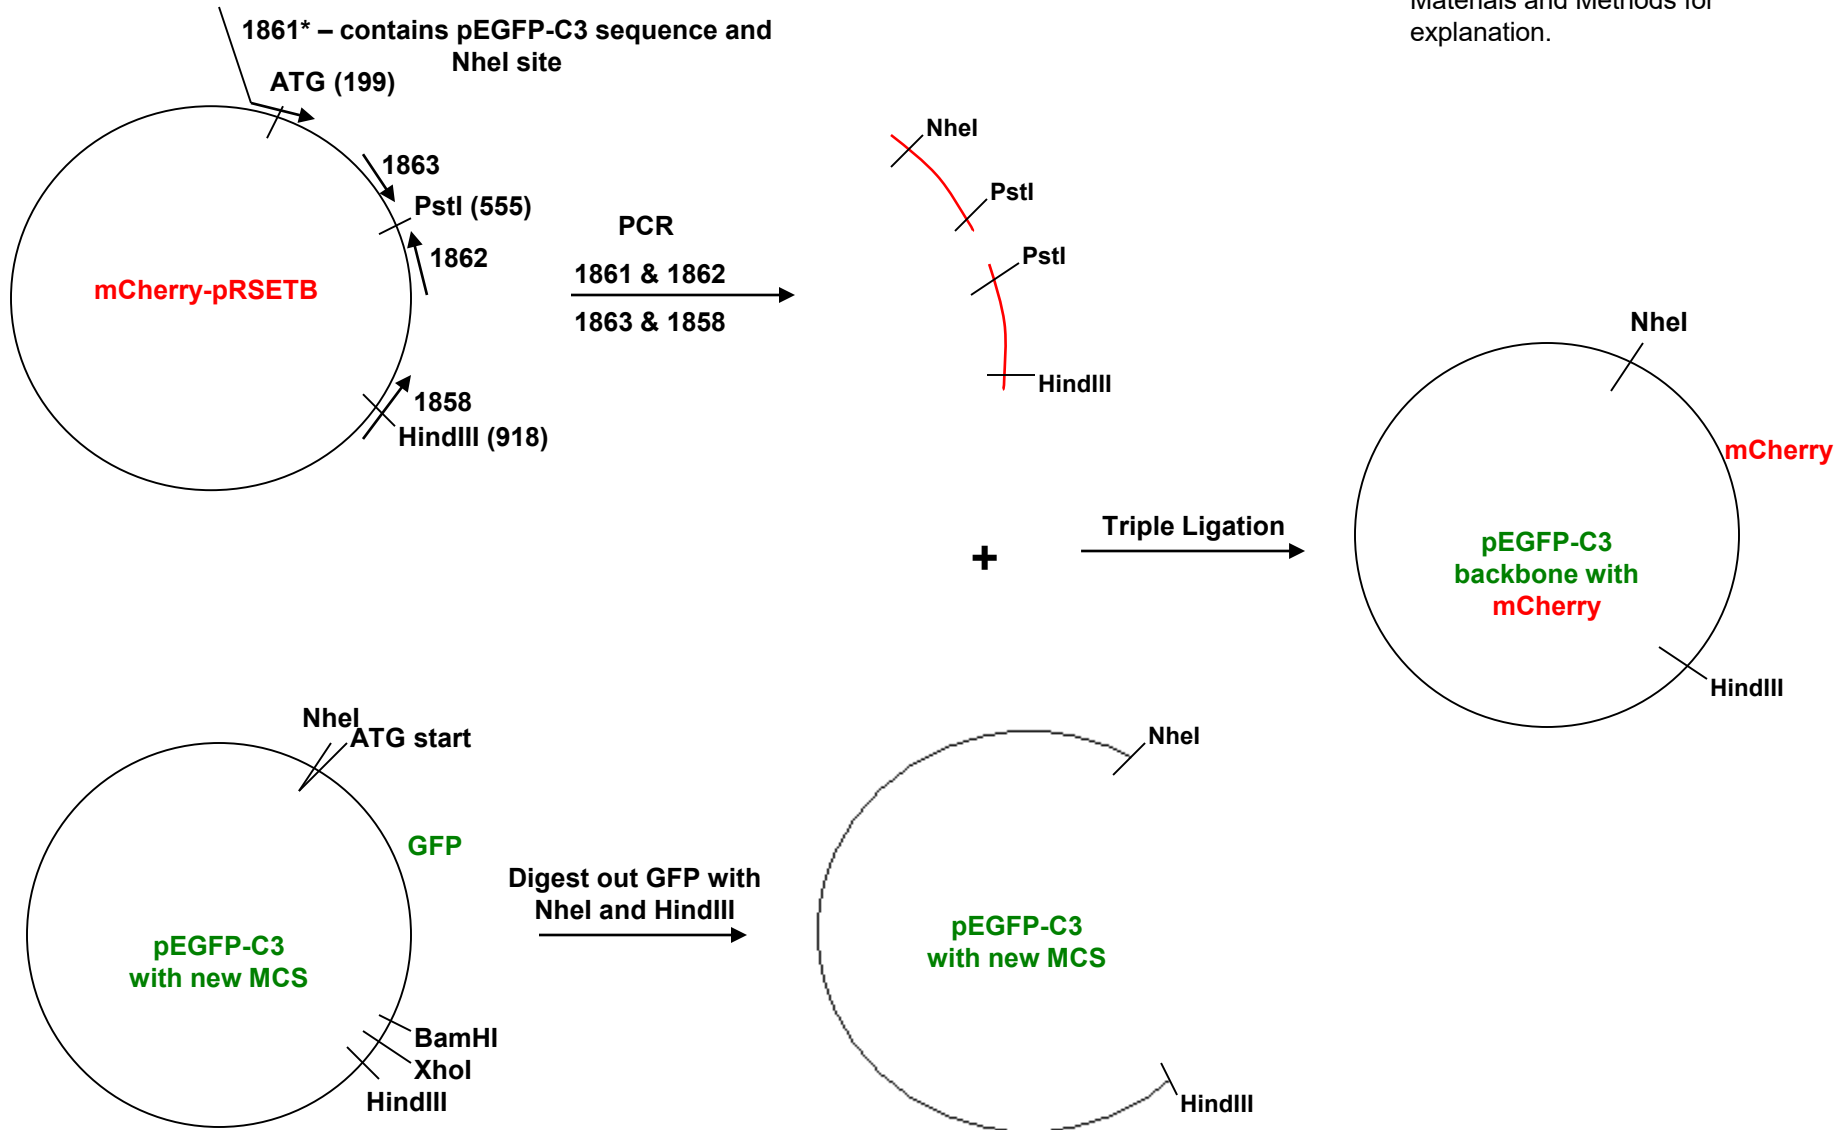

Supplementary Fig. 3. Exchange of mCherry sequence for GFP sequence in pEGFP-C3 background. See Materials and Methods for explanation.

\*1861 – This forward primer contains bp 592-612 of pEGFP-C3, including an NheI site, and bp 199-207 of mCherry-pRSETB
