# Supplementary material
Source: PubMed Central journal article supplement (PMC7316388)
Supplement: NIHMS1591085-supplement-Supplemental_figure_5.pdf [file NIHMS1591085-supplement-Supplemental_figure_5.pdf]

Supplementary Figure 5.

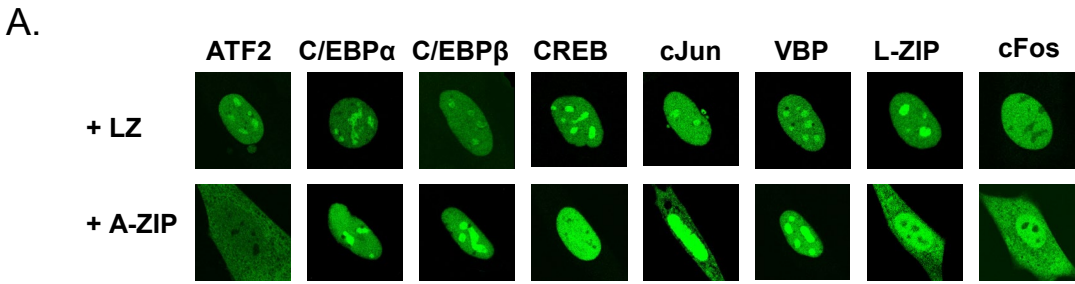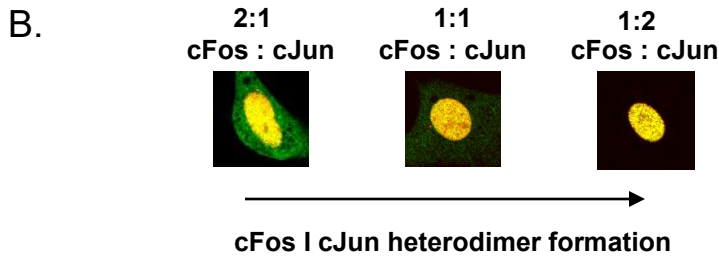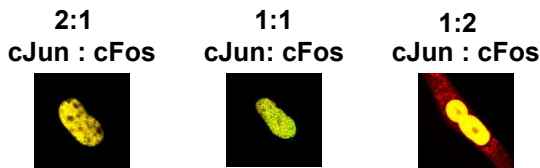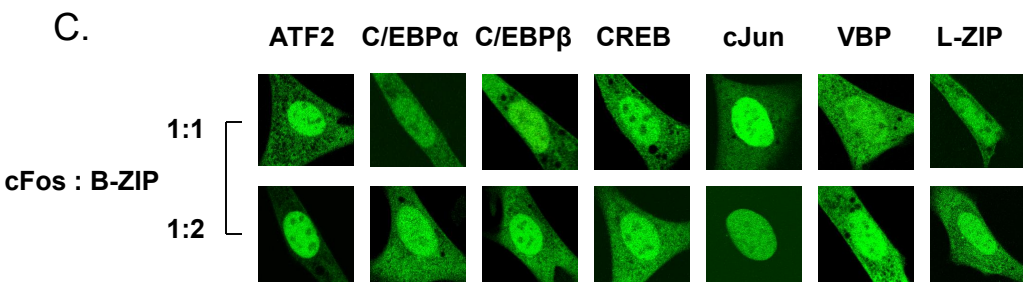

Supplementary Fig. 5. Heterodimerization of cJun and cFos changes the localization of cFos. A) NIH3T3 cells were transiently co-transfected with GFP-cJun and either mCherry-LZs or mCherry-A-ZIPs. The acidic extension is necessary to cause cytoplasmic localization of cJun. B, C) Cells were transiently co-transfected with different ratios of GFP-cFos and mCherry-B-ZIPs. cFos does not homodimerize and is expressed throughout the cell (B). Excess mCherry-cJun drives heterodimerization and nuclear localization of GFP-cFos. This effect is specific to cJun and ATF2, two partners known to heterodimerize with cFos (C).
